# Supplementary material for: Preparation, characterization, physical properties, and photoconducting behaviour of anthracene derivative nanowires
Source: Royal Society of Chemistry journal article supplement (doi:10.1039/c1nr10655d), 2011-01-01
Supplement: c1nr10655d.pdf [file c1nr10655d.pdf]

## Supporting information

### Preparation, characterization, physical properties, and photoconducting behaviour of anthracene derivative nanowires

Jinchong Xiao,<sup>a,b</sup> Zongyou Yin,<sup>a</sup> Bo Yang,<sup>a,b</sup> Yi Li<sup>a</sup>, Li Ji<sup>c</sup>, Jun Guo,<sup>a</sup> Ling Huang,<sup>d</sup> Xuewei Liu<sup>c</sup>, Alex Qingyu Yan,<sup>a</sup> Hua Zhang,<sup>\*a</sup> and Qichun Zhang<sup>\*a</sup>

<sup>a</sup>School of Materials Science and Engineering, Nanyang Technological University, 50 Nanyang Avenue, Singapore 639798 (Singapore). Tel: 65- 67904705; E-mail: H Zhang@ntu.edu.sg, qc Zhang@ntu.edu.sg.

<sup>b</sup>Key Laboratory of Chemical Biology of Hebei Province, College of Chemistry and Environmental Science, Hebei University, Baoding 071002, China.

<sup>c</sup>School of Physical and Mathematical Sciences, Nanyang Technological University, 1 Nanyang Walk, Singapore, 637616, (Singapore).

<sup>d</sup>School of Chemical and Biomedical Engineering, Nanyang Technological University, 70 Nanyang Avenue, Singapore 637457 (Singapore).

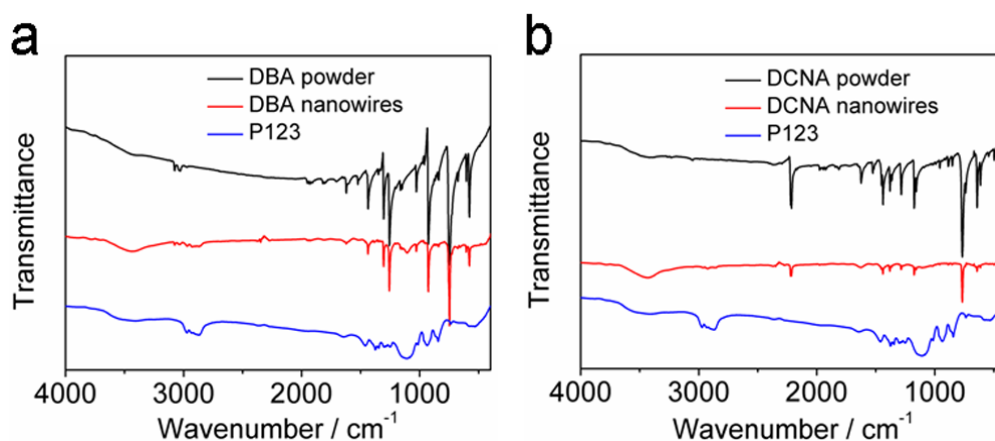

**Figure S1.** (a) FT-IR spectra of DBA powder (black line), DBA nanowires (red line), and P123 (blue line). (b) FT-IR spectra of DCNA powder (black line), DCNA nanowires (red line), and P123 (blue line).
